# Supplementary material for: The 1257 Samalas eruption (Lombok, Indonesia): the single greatest stratospheric gas release of the Common Era
Source: PubMed Central journal article supplement (PMC5056521; doi:10.1038/srep34868), 2016-10-10
Supplement: srep34868-s1.pdf [file srep34868-s1.pdf]

# **The 1257 Samalas eruption (Lombok, Indonesia): the single greatest stratospheric gas release of the Common Era**

**Céline M Vidal<sup>1,\*</sup>, Nicole Métrich<sup>1</sup>, Jean-Christophe Komorowski<sup>1</sup>, Indyo Pratomo<sup>2</sup>,  
Agnès Michel<sup>1</sup>, Nugraha Kartadinata<sup>3</sup>, Vincent Robert<sup>4</sup>, and Franck Lavigne<sup>5</sup>**

<sup>1</sup>Institut de Physique du Globe de Paris, Université Sorbonne Paris Cité, CNRS UMR 7154, Paris, 75005, France

<sup>2</sup>Museum of Geologi, Badan Geologi, Bandung, 40122, Indonesia

<sup>3</sup>Center of Volcanology and Geological Hazards Mitigation, Badan Geologi, Bandung, 40122, Indonesia

<sup>4</sup>Observatoire Volcanologique et Sismologique de la Guadeloupe IPGP, Gourbeyre, 97113, France

<sup>5</sup>Laboratoire de Géographie Physique UMR 8591, Université Paris 1 Panthéon-Sorbonne, 1 Place Aristide Briand, 92195 Meudon, France, France

\*vidal@ipgp.fr

## **Supplementary Information**

**Sample description and data treatment**

**Figure S1 Microphotographs of melt inclusions**

**Figure S2 Major element variation diagrams**

**Figure S3 Trace element variation diagrams**

**Figure S4 Volatile element variation diagrams**

**Figure S5 Fluid inclusions compositions**

**Table S1 Whole-rock compositions**

**Table S2 and S3 Melt inclusions compositions**

**Table S4 Composition of sulphides**

**Table S5 and Figure S6 Apatite compositions**

**Table S6 Composition of amphibole**

**Table S7 Standards for trace element analysis in melt inclusions**

**Table S8 Standards for volatile element analysis of whole-rocks**

**References**

## Sample description and data treatment

### 1257 A.D. samples

Glassy melt inclusions are present in most crystal phases of the 1257 A.D. pumice clasts (ortho-(opx) and clino-(cpx) pyroxene, amphibole and plagioclase), and are most abundant in plagioclase. These melt inclusions are squared or irregular in shape, with sizes ranging from  $\sim 10 \mu\text{m}$  to  $\sim 60 \mu\text{m}$  (Supplementary Figure S1). They are trapped in both calcic plagioclase cores and more sodic rims of zoned plagioclase ( $\text{An}_{49}$  to  $\text{An}_{86}$ ), recording the complex history of the 1257 magma. Some melt inclusions bear sulfide globules of up to  $\sim 4 \mu\text{m}$  in diameter. A total of 41 melt inclusions were analysed in plagioclase from pumice clasts of phases P1, P2 and P3 for major element and volatiles, among which 18 melt inclusions from P1 and P3 were analysed for trace element and 20 for  $\text{H}_2\text{O}$  and  $\text{CO}_2$  by FT-IR spectroscopy. We analysed 9 melt inclusions in cpx, 15 melt inclusions in opx and 6 melt inclusions in amphibole for major elements, S and Cl. Matrix glasses of pumice clasts from P1, P2, P3 and P4 fallout units were analysed in 8 samples from proximal and distal outcrops<sup>1</sup>. Matrix glasses from pumices clasts erupted during phases P3 and P4 contain systematically microlites of feldspar, pyroxene and Fe-Ti oxide. Average compositions are reported in Supplementary Table S2.

### 712 A.D. samples

Glassy melt inclusions occur in the  $\text{Fo}_{71-77}$  olivine of the 712 A.D. scoria fallout (Métrich et al., submitted). Some olivine crystals contain inclusions that are partly or entirely crystallized. Melt inclusions are perfectly rounded with diameters ranging from  $\sim 10 \mu\text{m}$  to  $\sim 120 \mu\text{m}$  (Supplementary Figure S1). A total of 20 melt inclusions were analysed for major elements and volatiles, among which 16 melt inclusions were analysed for  $\text{H}_2\text{O}$  and  $\text{CO}_2$  by FT-IR spectroscopy, and 14 for trace elements. The mineral/melt equilibrium was tested for all melt inclusions of the dataset. Given that the melt inclusion/olivine distribution coefficient  $K_D^{\text{Mg-Fe}}_{\text{ol-liq}}$  depends on oxygen fugacity,  $K_D^{\text{Mg-Fe}}_{\text{ol-liq}}$  values were calculated for NNO ( $K_D$  of 0.29-0.37) and NNO+0.5 ( $K_D$  of 0.30-0.39) at  $1040 \text{ }^\circ\text{C}$ <sup>2</sup>. Low  $K_D$  values (0.29-0.35) are consistent with equilibrium between melt inclusions and their host olivine, thus excluding post entrapment crystallization processes. 6 melt inclusions displayed  $K_D$  values  $\geq 0.35$ , and theoretical equilibrium olivine composition  $\text{Fo}_{th} \geq 4\%$  higher than the measured forsterite content  $\text{Fo}_{measured}$  of their host, suggesting minor Fe-loss<sup>3</sup>. These melt inclusions were excluded from further consideration, except two of them that displayed acceptable  $K_D$  values (0.36) given the uncertainty on the redox state. Average compositions are reported in Supplementary Table S3.

### 2550 B.P. samples

Plagioclase crystals ( $\text{An}_{73}$  to  $\text{An}_{77}$ ) from the 2550 B.P.<sup>4</sup> pumice fallout contain abundant glassy melt inclusions, most of which are irregular in shape. The most regular squarish melt inclusions are up to  $\sim 50 \mu\text{m}$  in size. Plagioclase-hosted melt inclusions in the 1257 and 2550 B.P. samples are dominantly located in the large cores together with glass. The melt inclusions most suitable for analysis are distributed along the growth plans of their host mineral. A total of 13 melt inclusions were analysed for major elements and volatiles (including  $\text{H}_2\text{O}$  and  $\text{CO}_2$  by FT-IR spectroscopy), among which 6 melt inclusions were analysed for trace element (Supplementary Table S3).

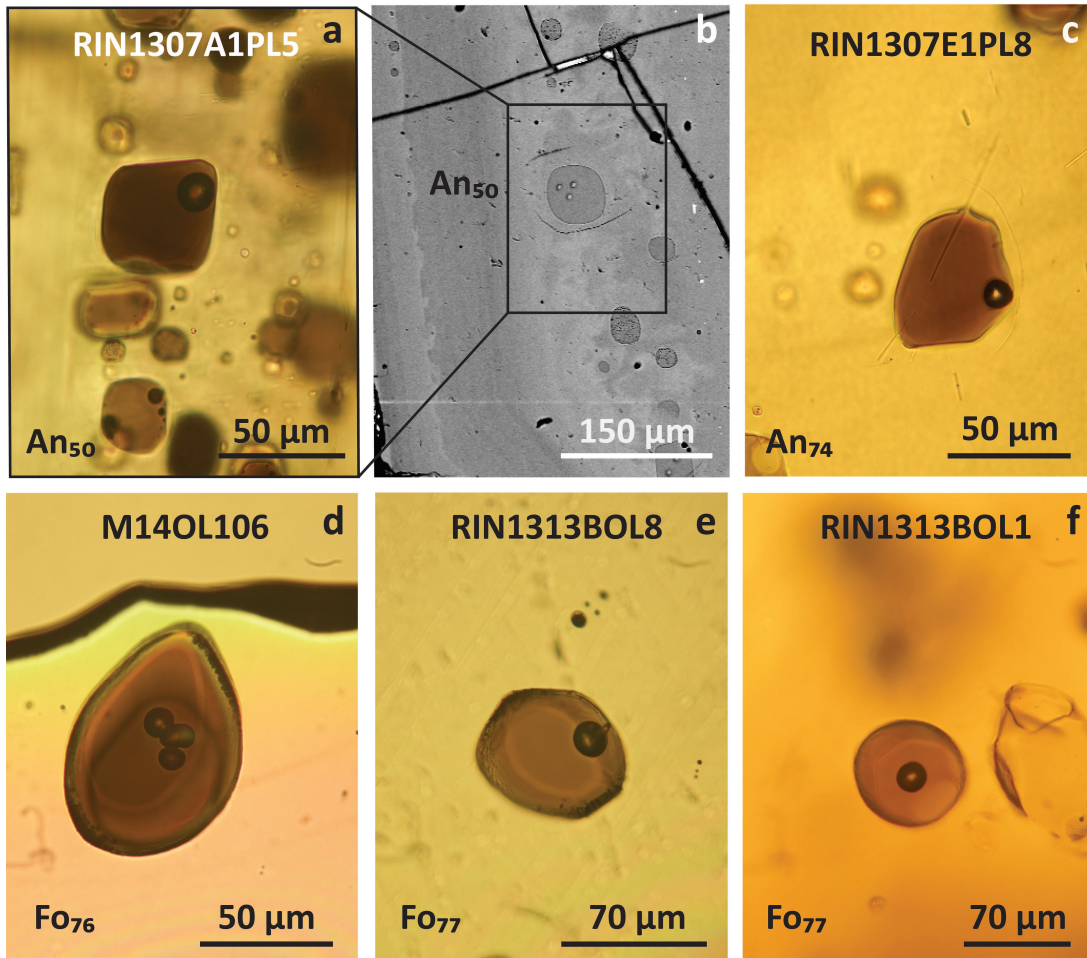

**Figure S1. Representative microphotographs of melt inclusions in this study**

**a** Transmitted light microphotograph before double polishing and **b** Backscattered electron scanning microscope (BSE) photographs of plagioclase-hosted melt inclusion RIN1307A1PL5 from phase P1 of the 1257 eruption. **c** Transmitted light of double-polished plagioclase-hosted melt inclusion RIN1307E1PL8 from phase P3 of the 1257 eruption. **d** Transmitted light microphotograph of doubled-polished olivine-hosted melt inclusion M14OL106 from 712 A.D. scoria. **e** and **f** Transmitted light microphotographs of doubled-polished olivine-hosted melt inclusions RIN1313BOL1 and RIN1313BOL8 from 712 A.D. scoria.

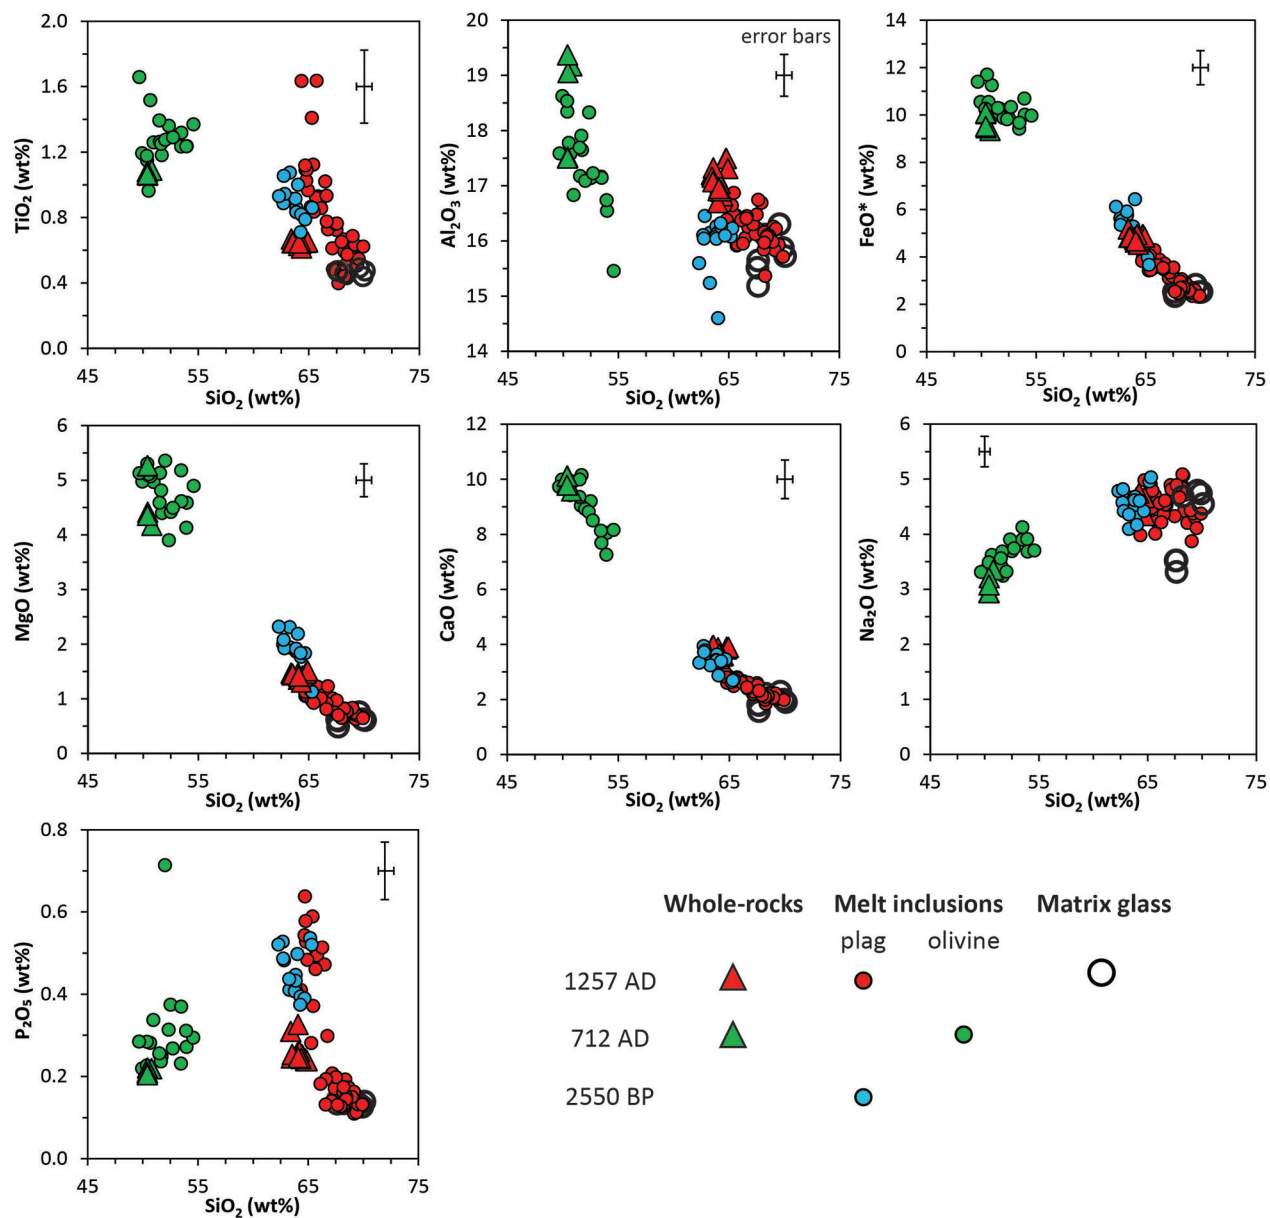

**Figure S2. Major element variation diagrams of the Rinjani-Samalas magmas**

Compositions of melt inclusions, whole-rocks and matrix glasses reflect the chemical bimodality of the Rinjani-Samalas magmas including the 712 A.D. basalts, the 2550 B.P. trachydacite and the 1257 A.D. trachydacite. All analyses are normalised to 100 wt%, free of volatiles.

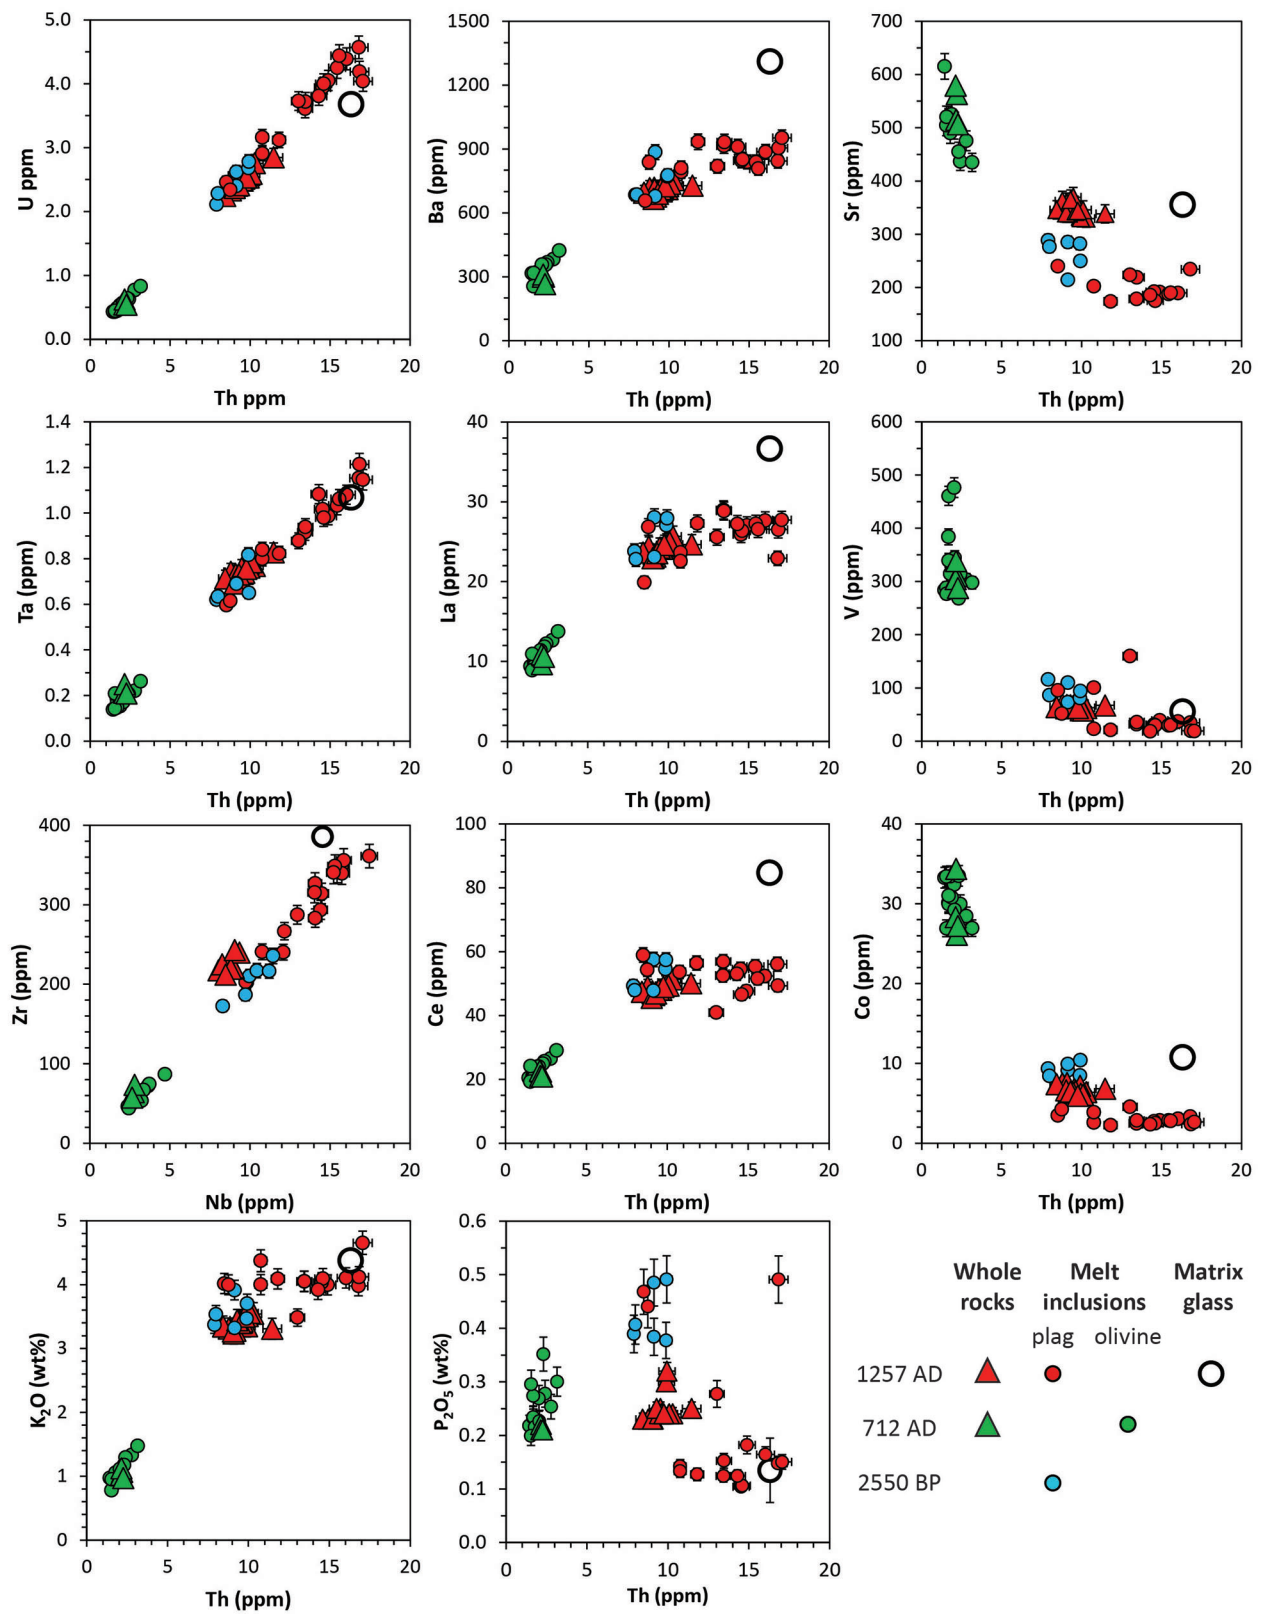

**Figure S3. Trace element variation diagrams for the Rinjani-Samalas magmas**

During in-situ crystallization (Th > 10 ppm), K<sub>2</sub>O, Ba, La and Ca do not behave as incompatible elements due to fractioning by amphibole and apatite. Error bars are reported for each point in each plot.

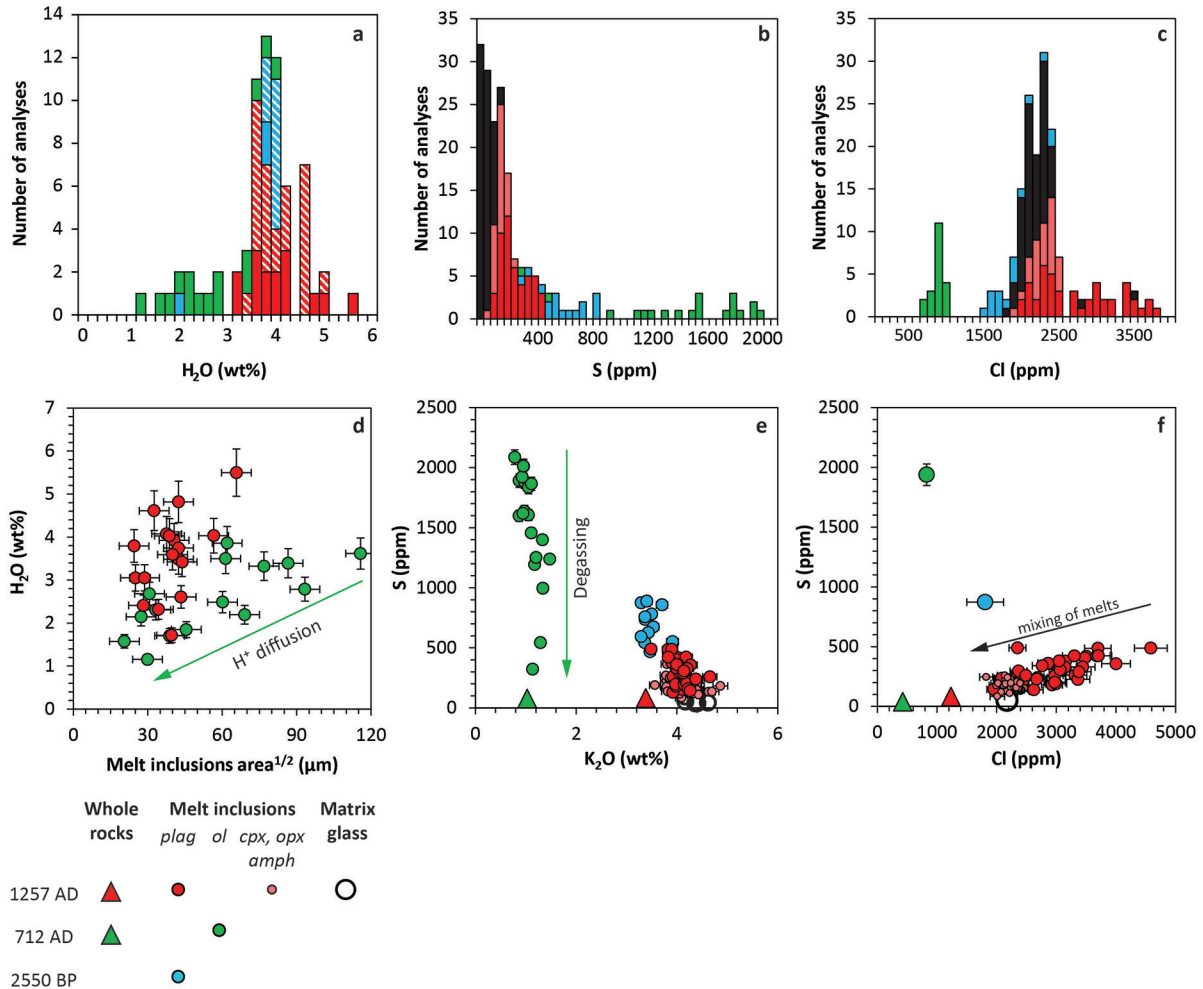



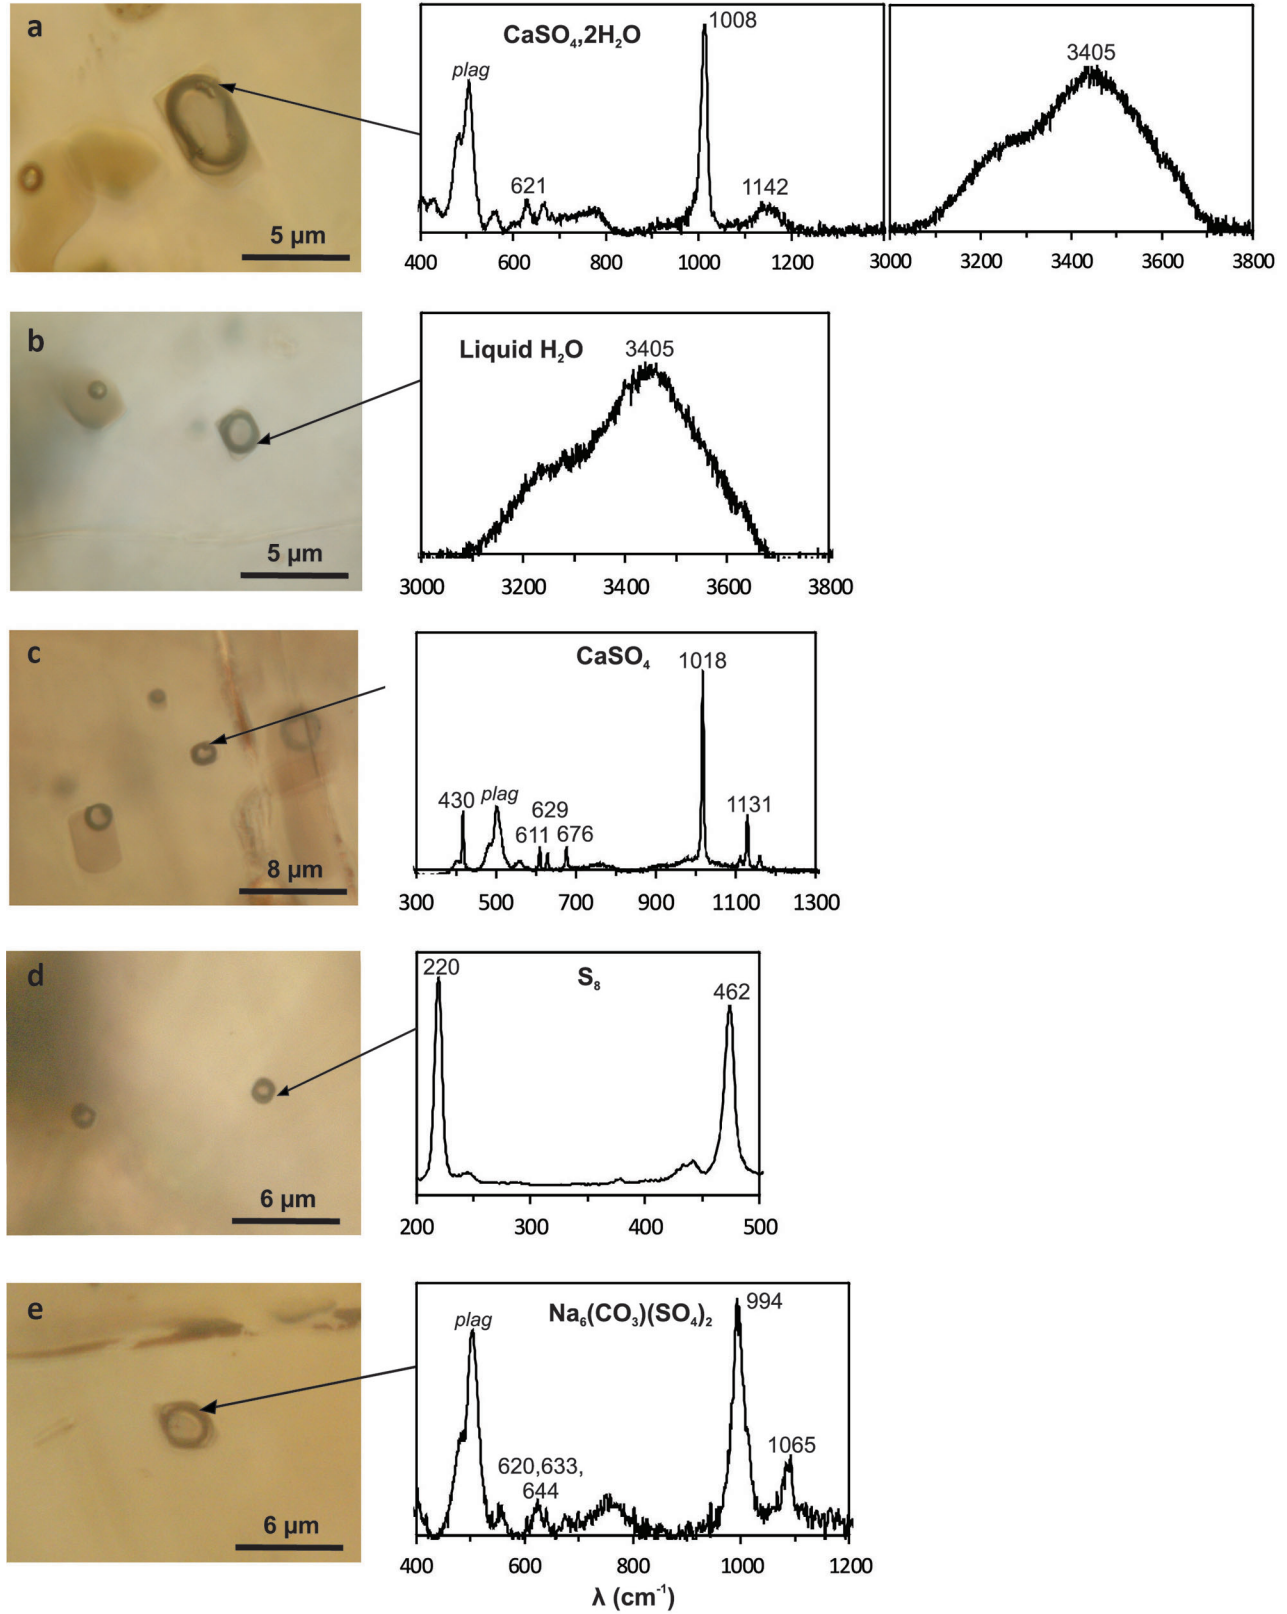

**Figure S5. Plagioclase-hosted fluid inclusions in the 1257 eruptive products**  
 Associated Raman spectras witness the presence of sulphur,  $\text{H}_2\text{O}$  and S in the pre-existing vapour phase.

**Table 1.** Average whole-rock major element (ICP-AES), sulphur and halogens (pyrohydrolysis/ICP-MS) and trace element (ICP-MS) data for 1257 A.D. and pre-1257 samples

| Sample                                    | 1257 A.D. |                 | 712 A.D.          |        |
|-------------------------------------------|-----------|-----------------|-------------------|--------|
| <i>n</i> <sup>1</sup>                     | 9         | SD <sup>2</sup> | 3                 | SD     |
| SiO <sub>2</sub> (wt%)                    | 62.3      | 0.7             | 50.3              | 0.8    |
| TiO <sub>2</sub>                          | 0.63      | 0.01            | 1.06              | 0.03   |
| Al <sub>2</sub> O <sub>3</sub>            | 16.6      | 0.3             | 19.1              | 0.2    |
| Fe <sub>2</sub> O <sub>3</sub> Total      | 4.7       | 0.1             | 10.43             | 0.06   |
| MnO                                       | 0.14      | <0.01           | 0.19              | <0.01  |
| MgO                                       | 1.39      | 0.06            | 4.29              | 0.11   |
| CaO                                       | 3.65      | 0.18            | 9.70              | 0.16   |
| Na <sub>2</sub> O                         | 4.09      | 0.68            | 3.20              | 0.18   |
| K <sub>2</sub> O                          | 3.38      | 0.08            | 1.02              | 0.05   |
| P <sub>2</sub> O <sub>5</sub>             | 0.24      | 0.01            | 0.21              | 0.01   |
| Total                                     | 97.1      |                 | 99.5              |        |
| SiO <sub>2</sub> Norm <sup>3</sup>        | 64.2      | 0.5             | 50.5              | 0.2    |
| (Na <sub>2</sub> O+K <sub>2</sub> O) Norm | 7.7       | 0.7             | 4.2               | 0.2    |
| S (ppm)                                   | 83        | 23              | 39                | 1      |
| Cl                                        | 1234      | 45              | 428               | 0      |
| F                                         | 560       | 14              | 228               | 6      |
| Br (ppb)                                  | 2916      | 78              | 1595              | 178    |
| As                                        | 3.6       | 0.3             | n.a. <sup>3</sup> | n.a.   |
| Ba                                        | 707       | 19              | 288               | 20     |
| Be                                        | 1.5       | 0.1             | 0.7               | 0.0    |
| Cd                                        | 0.26      | 0.03            | 0.16              | 0.03   |
| Ce                                        | 48        | 1               | 22                | 1      |
| Cs                                        | 3.0       | 0.2             | 0.6               | 0.1    |
| Co                                        | 6.7       | 0.5             | 27.2              | 1.1    |
| Cu                                        | 13        | 4               | 95                | 9      |
| Dy                                        | 4.6       | 0.2             | 3.4               | 0.1    |
| Er                                        | 2.8       | 0.1             | 1.9               | 0.0    |
| Eu                                        | 1.27      | 0.04            | 1.18              | 0.03   |
| Ga                                        | 17.7      | 0.3             | 20.2              | 0.4    |
| Gd                                        | 4.6       | 0.1             | 3.35              | 0.08   |
| Ge                                        | 1.50      | 0.04            | 1.55              | 0.07   |
| Hf                                        | 5.7       | 0.2             | 1.8               | 0.1    |
| Ho                                        | 0.98      | 0.06            | 0.70              | 0.02   |
| La                                        | 24.1      | 0.6             | 10.7              | 0.2    |
| Lu                                        | 0.50      | 0.01            | 0.31              | 0.01   |
| Mo                                        | 3.2       | 0.2             | 0.91              | 0.08   |
| Nb                                        | 8.7       | 0.4             | 2.74              | 0.08   |
| Nd                                        | 22.5      | 0.4             | 12.7              | 0.4    |
| Pb                                        | 14        | 1               | 5.3               | 0.3    |
| Pr                                        | 5.7       | 0.1             | 2.86              | 0.06   |
| Rb                                        | 83        | 3               | 19                | 1      |
| Sc                                        | 9.7       | 0.5             | 30.4              | 0.3    |
| Sb                                        | 0.29      | 0.03            | 3.30              | 0.07   |
| Sm                                        | 5.0       | 0.1             | 0.8               | 0.1    |
| Sr                                        | 351       | 12              | 549               | 38     |
| Ta                                        | 0.75      | 0.04            | 0.212             | 0.004  |
| Tb                                        | 0.74      | 0.01            | 0.54              | 0.01   |
| Th                                        | 9.5       | 0.9             | 2.20              | 0.07   |
| Tm                                        | 0.444     | 0.009           | 0.289             | 0.006  |
| U                                         | 2.5       | 0.2             | 0.55              | 0.01   |
| V                                         | 65        | 3               | 301               | 12     |
| Y                                         | 28.8      | 0.5             | 19.8              | 0.5    |
| Yb                                        | 3.12      | 0.07            | 1.95              | 0.03   |
| Zr                                        | 224.7     | 10.2            | 64.9              | 8.2    |
| Rb/Th                                     | 8.8       | 0.7             | 8.5               | 0.4    |
| Zr/Nb                                     | 26        | 1               | 24                | 2      |
| Br/Cl                                     | 0.0022    | 0.0003          | 0.0037            | 0.0004 |

<sup>1</sup> n: number of averaged values

<sup>2</sup> SD is the standard deviation of the mean (1 $\sigma$ )

<sup>3</sup> Normalized on anhydrous basis

<sup>4</sup> n.d., not detected; n.a., not analysed



**Table 2.** Average compositions of matrix glasses and melt inclusions trapped in plagioclase, cpx, opx and amphibole from the 1257 pumices

| Mineral phase                  | Plagioclase           |                 | An70–81               |      | Clinopyroxene         |      | Orthopyroxene         |      | Amphibole             |       | Matrix glass           |      |
|--------------------------------|-----------------------|-----------------|-----------------------|------|-----------------------|------|-----------------------|------|-----------------------|-------|------------------------|------|
|                                | <i>f</i> <sub>5</sub> | SD <sup>2</sup> | <i>n</i> <sub>1</sub> | SD   | <i>n</i> <sub>9</sub> | SD   | <i>f</i> <sub>5</sub> | SD   | <i>n</i> <sub>6</sub> | SD    | <i>n</i> <sub>94</sub> | SD   |
| SiO <sub>2</sub> (wt%)         | 64.8                  | 0.1             | 61.7                  | 0.1  | 66.1                  | 0.9  | 65.6                  | 1.4  | 64.9                  | 0.7   | 68.7                   | 1.1  |
| TiO <sub>2</sub>               | 0.6                   | 0.2             | 0.9                   | 0.1  | 0.46                  | 0.06 | 0.47                  | 0.06 | 0.47                  | 0.05  | 0.47                   | 0.01 |
| Al <sub>2</sub> O <sub>3</sub> | 15.1                  | 0.3             | 15.3                  | 0.4  | 15.2                  | 0.5  | 15.4                  | 0.4  | 15.6                  | 0.3   | 15.8                   | 0.3  |
| FeO <sub>total</sub>           | 2.61                  | 0.05            | 3.79                  | 0.06 | 2.59                  | 0.09 | 3.0                   | 0.1  | 2.7                   | 0.2   | 2.6                    | 0.1  |
| MnO                            | 0.1                   | 0.1             | 0.2                   | 0.1  | 0.08                  | 0.02 | 0.13                  | 0.04 | 0.10                  | 0.04  | 0.12                   | 0.01 |
| MgO                            | 0.7                   | 0.2             | 1.0                   | 0.1  | 0.58                  | 0.07 | 0.64                  | 0.05 | 0.65                  | 0.05  | 0.63                   | 0.08 |
| CaO                            | 2.1                   | 0.2             | 2.6                   | 0.4  | 1.9                   | 0.1  | 2.1                   | 0.2  | 2.1                   | 0.2   | 1.9                    | 0.2  |
| Na <sub>2</sub> O              | 4.1                   | 0.2             | 4.4                   | 0.1  | 4.5                   | 0.3  | 4.6                   | 0.2  | 4.67                  | 0.07  | 4.2                    | 0.7  |
| K <sub>2</sub> O               | 4.00                  | 0.05            | 3.94                  | 0.09 | 4.3                   | 0.2  | 4.1                   | 0.4  | 4.2                   | 0.2   | 4.4                    | 0.2  |
| P <sub>2</sub> O <sub>5</sub>  | 0.1                   | 0.5             | 0.5                   | 0.8  | 0.2                   | 0.1  | 0.12                  | 0.01 | 0.131                 | 0.009 | 0.13                   | 0.06 |
| H <sub>2</sub> O               | 3.9                   | 0.6             | 3.7                   | 1.2  | n.a. <sup>3</sup>     | n.a. | n.a.                  | n.a. | n.a.                  | n.a.  | 0.13                   | 0.06 |
| Total                          | 98.1                  |                 | 98.1                  |      | 95.9                  |      | 96.3                  |      | 95.4                  |       | 98.8                   |      |
| S (ppm)                        | 236                   | 78              | 348                   | 90   | 150                   | 20   | 180                   | 46   | 183                   | 45    | 51                     | 22   |
| Cl                             | 2429                  | 390             | 3377                  | 455  | 2282                  | 139  | 2232                  | 139  | 2172                  | 211   | 2171                   | 109  |
| Sc                             | 10.5                  | 1.5             | 17.7                  | 4.0  |                       |      |                       |      |                       |       |                        |      |
| V                              | 31                    | 10              | 118                   | 36   |                       |      |                       |      |                       |       |                        |      |
| Co                             | 2.8                   | 0.6             | 4.0                   | 0.5  |                       |      |                       |      |                       |       |                        |      |
| Ni                             | n.d.                  | n.d.            | n.d.                  | n.d. |                       |      |                       |      |                       |       |                        |      |
| Cu                             | 6.5                   | 1.0             | 12.7                  | 5.5  |                       |      |                       |      |                       |       |                        |      |
| Rb                             | 123                   | 16              | 108                   | 12   |                       |      |                       |      |                       |       |                        |      |
| Sr                             | 196                   | 20              | 226                   | 28   |                       |      |                       |      |                       |       |                        |      |
| Y                              | 31.9                  | 3.6             | 35.8                  | 7.7  |                       |      |                       |      |                       |       |                        |      |
| Zr                             | 303                   | 47              | 242                   | 41   |                       |      |                       |      |                       |       |                        |      |
| Nb                             | 13.9                  | 2.2             | 12.0                  | 2.1  |                       |      |                       |      |                       |       |                        |      |
| Ba                             | 875                   | 45              | 762                   | 92   |                       |      |                       |      |                       |       |                        |      |
| La                             | 26.6                  | 1.8             | 22.7                  | 2.8  |                       |      |                       |      |                       |       |                        |      |
| Ce                             | 53.4                  | 3.3             | 47.7                  | 6.8  |                       |      |                       |      |                       |       |                        |      |
| Pr                             | 6.0                   | 0.4             | 5.7                   | 0.9  |                       |      |                       |      |                       |       |                        |      |
| Nd                             | 25.0                  | 1.7             | 25.1                  | 3.8  |                       |      |                       |      |                       |       |                        |      |
| Sm                             | 5.5                   | 0.6             | 6.4                   | 0.8  |                       |      |                       |      |                       |       |                        |      |
| Eu                             | 1.1                   | 0.1             | 1.0                   | 0.1  |                       |      |                       |      |                       |       |                        |      |
| Gd                             | 5.0                   | 0.6             | 6.2                   | 1.5  |                       |      |                       |      |                       |       |                        |      |
| Tb                             | 0.8                   | 0.1             | 0.9                   | 0.2  |                       |      |                       |      |                       |       |                        |      |
| Dy                             | 5.4                   | 0.6             | 6.2                   | 1.8  |                       |      |                       |      |                       |       |                        |      |
| Ho                             | 1.1                   | 0.1             | 1.3                   | 0.3  |                       |      |                       |      |                       |       |                        |      |
| Er                             | 3.5                   | 0.4             | 3.9                   | 1.0  |                       |      |                       |      |                       |       |                        |      |
| Tm                             | 0.6                   | 0.1             | 0.6                   | 0.2  |                       |      |                       |      |                       |       |                        |      |
| Yb                             | 4.0                   | 0.5             | 4.2                   | 1.3  |                       |      |                       |      |                       |       |                        |      |
| Lu                             | 0.6                   | 0.1             | 0.6                   | 0.2  |                       |      |                       |      |                       |       |                        |      |
| Hf                             | 7.6                   | 1.2             | 5.9                   | 1.3  |                       |      |                       |      |                       |       |                        |      |
| Ta                             | 1.0                   | 0.2             | 0.8                   | 0.2  |                       |      |                       |      |                       |       |                        |      |
| Pb                             | 19                    | 2               | 19                    | 5    |                       |      |                       |      |                       |       |                        |      |
| Th                             | 13.9                  | 2.4             | 10.8                  | 2.3  |                       |      |                       |      |                       |       |                        |      |
| U                              | 3.7                   | 0.6             | 3.1                   | 0.6  |                       |      |                       |      |                       |       |                        |      |

<sup>1</sup> *n*: number of averaged values

<sup>2</sup> SD is the standard deviation of the mean ( $1\sigma$ )

<sup>3</sup> n.d., not detected; n.a., not analysed

\* Trace element compositions of pumice clasts <63 μm from Métrich et al. (submitted)

**Table 3.** Average compositions of 2550 B.P. plagioclase-hosted melt inclusions representative of the 1257 A.D. whole-rock and 712 A.D. olivine-hosted melt inclusions representative of the 712 A.D. basaltic scoria

| Sample<br>Mineral phase<br><i>n</i> <sup>1</sup> | 2550 B.P.<br>Plagioclase |                 |      |      | 712 A.D.<br>Olivine |      |      |      |
|--------------------------------------------------|--------------------------|-----------------|------|------|---------------------|------|------|------|
|                                                  | 6                        | SD <sup>2</sup> | Min  | Max  | 8                   | SD   | Min  | Max  |
| SiO <sub>2</sub> (wt%)                           | 60.5                     | 1.3             | 58.8 | 62.4 | 48.5                | 0.6  | 47.8 | 51.6 |
| TiO <sub>2</sub>                                 | 0.85                     | 0.07            | 0.66 | 1.00 | 1.1                 | 0.1  | 0.9  | 1.5  |
| Al <sub>2</sub> O <sub>3</sub>                   | 15.0                     | 0.5             | 14.2 | 15.7 | 17.1                | 0.7  | 14.6 | 17.9 |
| FeO <sub>Total</sub>                             | 5.2                      | 0.7             | 4.5  | 6.3  | 9.8                 | 0.6  | 8.9  | 11.2 |
| MnO                                              | 0.15                     | 0.02            | 0.06 | 0.19 | 0.20                | 0.02 | 0.18 | 0.26 |
| MgO                                              | 1.9                      | 0.2             | 1.7  | 2.2  | 4.6                 | 0.5  | 3.7  | 5.1  |
| CaO                                              | 3.2                      | 0.2             | 2.8  | 3.7  | 9.2                 | 0.5  | 7.7  | 9.6  |
| Na <sub>2</sub> O                                | 4.3                      | 0.2             | 3.9  | 4.6  | 3.2                 | 0.3  | 2.8  | 3.7  |
| K <sub>2</sub> O                                 | 3.6                      | 0.2             | 3.3  | 3.9  | 1.0                 | 0.1  | 0.8  | 1.3  |
| P <sub>2</sub> O <sub>5</sub>                    | 0.42                     | 0.05            | 0.35 | 0.50 | 0.24                | 0.03 | 0.20 | 0.35 |
| H <sub>2</sub> O                                 | 3.9                      | 0.1             | 1.6  | 3.7  | 3.5                 | 0.2  | 1.2  | 3.9  |
| Total                                            | 98.9                     |                 |      |      | 98.5                |      |      |      |
| CO <sub>2</sub> (ppm)                            | n.d. <sup>3</sup>        | n.d.            | n.d. | n.d. | 508                 | 298  | 270  | 826  |
| S                                                | 647                      | 139             | 469  | 888  | 1939                | 88   | 323  | 2088 |
| Cl                                               | 1807                     | 309             | 1455 | 2310 | 827                 | 77   | 668  | 994  |
| Sc                                               | 15.1                     | 2.0             | 13   | 18   | 28.8                | 2.0  | 24   | 31   |
| V                                                | 93                       | 17              | 73   | 116  | 343                 | 58   | 268  | 476  |
| Co                                               | 9.3                      | 0.8             | 8    | 10   | 30.6                | 2.1  | 27   | 33   |
| Ni                                               | n.d.                     | n.d.            | n.d. | n.d. | 16.4                | 5.1  | 10.0 | 29.8 |
| Cu                                               | 11.4                     | 1.8             | 9    | 14   | 114                 | 32   | 54   | 248  |
| Rb                                               | 84                       | 9               | 71   | 95   | 18                  | 2    | 14   | 27   |
| Sr                                               | 266                      | 29              | 214  | 289  | 512                 | 11   | 437  | 615  |
| Y                                                | 32.2                     | 4.4             | 28   | 39   | 18.6                | 1.5  | 16   | 22   |
| Zr                                               | 206                      | 23              | 173  | 236  | 52                  | 4    | 44   | 74   |
| Nb                                               | 10.2                     | 1.1             | 8.3  | 11.4 | 2.8                 | 0.3  | 2.4  | 3.7  |
| Ba                                               | 747                      | 81              | 679  | 885  | 303                 | 30   | 256  | 367  |
| La                                               | 25.5                     | 2.5             | 23   | 28   | 10.0                | 0.8  | 9    | 12   |
| Ce                                               | 52.4                     | 4.6             | 48   | 58   | 21.4                | 1.8  | 19   | 26   |
| Pr                                               | 6.1                      | 0.6             | 5.5  | 6.9  | 2.7                 | 0.2  | 2.4  | 3.1  |
| Nd                                               | 26.6                     | 3.1             | 24   | 31   | 12.9                | 1.2  | 11   | 15   |
| Sm                                               | 5.9                      | 0.7             | 4.9  | 6.6  | 3.4                 | 0.3  | 3.1  | 4.0  |
| Eu                                               | 1.5                      | 0.2             | 1.3  | 1.7  | 1.1                 | 0.1  | 1.0  | 1.4  |
| Gd                                               | 5.7                      | 1.1             | 4.6  | 7.6  | 3.3                 | 0.3  | 2.9  | 3.7  |
| Tb                                               | 0.9                      | 0.1             | 0.8  | 1.1  | 0.53                | 0.04 | 0.5  | 0.6  |
| Dy                                               | 5.8                      | 0.8             | 4.9  | 7.2  | 3.5                 | 0.2  | 3.1  | 4.4  |
| Ho                                               | 1.1                      | 0.1             | 1.0  | 1.3  | 0.7                 | 0.1  | 0.6  | 0.8  |
| Er                                               | 3.4                      | 0.5             | 2.8  | 4.2  | 2.1                 | 0.2  | 1.9  | 2.4  |
| Tm                                               | 0.5                      | 0.1             | 0.4  | 0.6  | 0.3                 | 0.0  | 0.2  | 0.4  |
| Yb                                               | 3.5                      | 0.4             | 3.0  | 4.1  | 2.1                 | 0.3  | 1.6  | 2.7  |
| Lu                                               | 0.5                      | 0.1             | 0.4  | 0.6  | 0.31                | 0.05 | 0.2  | 0.4  |
| Hf                                               | 5.1                      | 0.6             | 4.3  | 5.7  | 1.5                 | 0.1  | 1.3  | 2.0  |
| Ta                                               | 0.7                      | 0.1             | 0.6  | 0.8  | 0.17                | 0.02 | 0.1  | 0.2  |
| Pb                                               | 13.7                     | 2.1             | 12   | 18   | 5.6                 | 0.6  | 5    | 9    |
| Th                                               | 9.0                      | 0.9             | 7.9  | 9.9  | 1.7                 | 0.2  | 1.4  | 2.4  |
| U                                                | 2.5                      | 0.3             | 2.1  | 2.8  | 0.48                | 0.05 | 0.4  | 0.6  |

<sup>1</sup> n: number of averaged values

<sup>2</sup> SD is the standard deviation of the mean (1 $\sigma$ )

<sup>3</sup> n.d., not detected; n.a., not analysed

**Table 4.** Average composition (EPMA) of sulphides in phenocrysts of the 1257 A.D., 712 A.D. and 2550 B.P. eruptive products

| Sample   | 712 A.D. |                 | 2550 B.P. |       | 1257 A.D.         |          |
|----------|----------|-----------------|-----------|-------|-------------------|----------|
| Sulphide | Cu-Fe-S  |                 | Fe-S      |       | Fe-S              |          |
| $n^1$    | 3        | SD <sup>2</sup> | 5         | SD    | 2                 | SD (wt%) |
| S (wt%)  | 32.1     | 0.6             | 38.6      | 0.4   | 38.9              | 0.5      |
| Fe       | 39.1     | 1.9             | 57.5      | 1.3   | 58.4              | 0.1      |
| Ni       | 0.4      | 0.2             | 0.1       | 0.1   | n.d. <sup>3</sup> | n.d.     |
| Cu       | 27.0     | 1.1             | 1.7       | 0.4   | 1.3               | 0.2      |
| Co       | 0.03     | 0.03            | 0.04      | 0.03  | 0.07              | 0.02     |
| Mn       | 0.07     | 0.02            | 0.11      | 0.03  | 0.06              | 0.01     |
| Si       | 0.07     | 0.09            | 0.008     | 0.007 | 0.018             | 0.005    |
| Total    | 98.92    |                 | 97.99     |       | 98.65             |          |

<sup>1</sup> n: number of averaged values

<sup>2</sup> SD is the standard deviation of the mean ( $1\sigma$ )

<sup>3</sup> n.d. not detected

**Table 5.** Average composition (EPMA) of apatite in phenocrysts of the 1257 A.D. samples (4 phases)

|                               | $n^1=168$ | SD <sup>2</sup> | Min   | Max   |
|-------------------------------|-----------|-----------------|-------|-------|
| CaO wt%                       | 54.2      | 0.6             | 50.93 | 55.13 |
| FeO                           | 0.6       | 0.1             | 0.36  | 1.56  |
| P <sub>2</sub> O <sub>5</sub> | 42.8      | 0.7             | 39.66 | 43.96 |
| F                             | 1.55      | 0.07            | 1.41  | 1.77  |
| S                             | 0.07      | 0.05            | 0.01  | 0.26  |
| Cl                            | 0.89      | 0.02            | 0.81  | 0.95  |

<sup>1</sup> n: number of averaged values

<sup>2</sup> SD is the standard deviation of the mean ( $1\sigma$ )

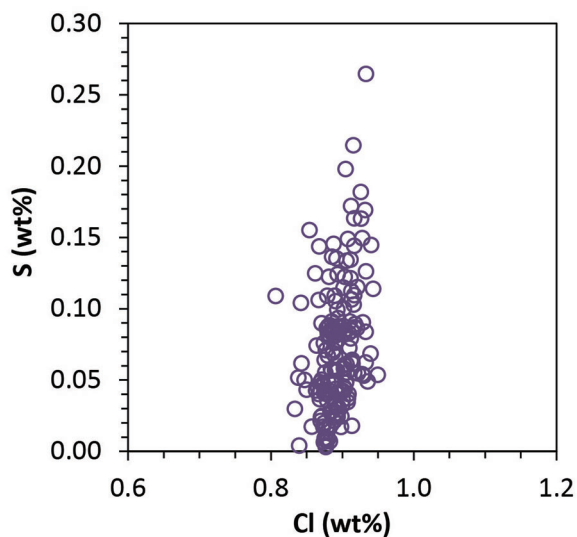

**Figure S6. Sulphur and chlorine composition of apatite from the 1257 A.D. eruptive products**  
Analyses from the four phases of the eruption are reported.

**Table 6.** Average composition (EPMA) of amphibole in the 1257 A.D. samples (4 phases)

|                                | n <sup>1</sup> =265 | SD <sup>2</sup> | Min   | Max   |
|--------------------------------|---------------------|-----------------|-------|-------|
| SiO <sub>2</sub> wt%           | 43.22               | 0.64            | 40.32 | 44.98 |
| TiO <sub>2</sub>               | 3.36                | 0.24            | 2.74  | 3.84  |
| Al <sub>2</sub> O <sub>3</sub> | 10.68               | 0.54            | 9.86  | 13.09 |
| FeO                            | 12.42               | 0.23            | 11.77 | 13.35 |
| MnO                            | 0.38                | 0.04            | 0.20  | 0.50  |
| MgO                            | 13.85               | 0.27            | 12.91 | 14.61 |
| CaO                            | 11.26               | 0.14            | 10.70 | 11.66 |
| Na <sub>2</sub> O              | 2.42                | 0.08            | 2.21  | 2.69  |
| K <sub>2</sub> O               | 0.78                | 0.06            | 0.57  | 0.92  |
| F                              | 0.25                | 0.03            | 0.17  | 0.33  |
| Cl                             | 0.07                | 0.01            | 0.02  | 0.10  |
| Total                          | 98.69               |                 |       |       |

<sup>1</sup> n: number of averaged values

<sup>2</sup> SD is the standard deviation of the mean (1 $\sigma$ )

**Table 7.** Average trace element concentrations of international standard BCR-2G by LA-ICP-MS compared to published data

| $n^1$    | This work |                 |                      | Sigmarsson et al. (2013) <sup>7</sup> |          | 2RSE (%) |      | Jenner et al. (2012) <sup>8</sup> |        |       | Jochum et al. (2014) <sup>9</sup> |  |  |
|----------|-----------|-----------------|----------------------|---------------------------------------|----------|----------|------|-----------------------------------|--------|-------|-----------------------------------|--|--|
|          | $I_0$     | SD <sup>2</sup> | RSD <sup>3</sup> (%) | 57-136                                | 2RSE (%) | 14-259   | SD   | RSD (%)                           | $I_2$  | SD    | RSD                               |  |  |
| Sc (ppm) | 33.50     | 1.20            | 3.6                  | 32.96                                 | 0.69     | 34.40    | 0.30 | 0.9                               | 33*    | 2.00  | 6.1                               |  |  |
| V        | 432.78    | 3.79            | 0.9                  | 433.69                                | -        | 436.00   | 5.00 | 1.1                               | 422.00 | 11.14 | 2.6                               |  |  |
| Co       | 38.76     | 0.83            | 2.2                  | 38.22                                 | -        | 39.70    | 0.50 | 1.2                               | 36.80  | 0.92  | 2.5                               |  |  |
| Ni       | 12.67     | 0.67            | 5.3                  | 12.39                                 | -        | 12.60    | 0.20 | 1.6                               | 14.57  | 2.12  | 14.6                              |  |  |
| Cu       | 18.17     | 0.69            | 3.8                  | 18.25                                 | 1.38     | 19.60    | 0.40 | 2.1                               | 17.70  | 1.35  | 7.6                               |  |  |
| Rb       | 49.08     | 1.39            | 2.8                  | 49.55                                 | 0.89     | 48.70    | 0.60 | 1.3                               | 46.13  | 1.50  | 3.3                               |  |  |
| Sr       | 334.56    | 6.06            | 1.8                  | 330.10                                | 0.38     | 339.00   | 5.00 | 1.3                               | 329.67 | 4.04  | 1.2                               |  |  |
| Y        | 31.42     | 1.32            | 4.2                  | 30.54                                 | 0.74     | 32.30    | 0.20 | 0.8                               | 31.73  | 1.42  | 4.5                               |  |  |
| Zr       | 169.57    | 7.01            | 4.1                  | 164.80                                | 0.79     | 181.00   | 7.00 | 3.9                               | 172.67 | 7.77  | 4.5                               |  |  |
| Nb       | 12.29     | 0.35            | 2.9                  | 12.14                                 | 0.61     | 12.70    | 0.30 | 2.4                               | 11.90  | 0.46  | 3.9                               |  |  |
| Ba       | 675.93    | 8.65            | 1.3                  | 674.25                                | 0.78     | 706.00   | 7.00 | 1.1                               | 664.33 | 16.77 | 2.5                               |  |  |
| La       | 24.20     | 0.60            | 2.5                  | 23.84                                 | 0.49     | 24.50    | 0.70 | 2.9                               | 24.03  | 0.72  | 3.0                               |  |  |
| Ce       | 51.87     | 0.68            | 1.3                  | 52.00                                 | 0.57     | 51.10    | 0.60 | 1.2                               | 50.77  | 1.66  | 3.3                               |  |  |
| Pr       | 6.41      | 0.11            | 1.7                  | 6.36                                  | 0.61     | 6.46     | 0.12 | 1.8                               | 6.38   | 0.12  | 1.9                               |  |  |
| Nd       | 27.96     | 0.79            | 2.8                  | 27.42                                 | 0.72     | 27.50    | 0.30 | 1.3                               | 27.30  | 0.56  | 2.0                               |  |  |
| Sm       | 6.41      | 0.25            | 3.9                  | 6.28                                  | 0.97     | 6.41     | 0.10 | 1.5                               | 6.39   | 0.18  | 2.8                               |  |  |
| Eu       | 1.86      | 0.10            | 5.1                  | 1.85                                  | 0.94     | 1.98     | 0.04 | 2.1                               | 1.87   | 0.05  | 2.6                               |  |  |
| Gd       | 6.11      | 0.37            | 6.0                  | 6.01                                  | 1.09     | 6.29     | 0.11 | 1.8                               | 6.24   | 0.26  | 4.1                               |  |  |
| Tb       | 0.94      | 0.06            | 6.1                  | 0.90                                  | 1.03     | 0.97     | 0.02 | 1.8                               | 0.93   | 0.06  | 6.7                               |  |  |
| Dy       | 6.13      | 0.28            | 4.5                  | 5.87                                  | 0.89     | 6.08     | 0.12 | 2.0                               | 5.93   | 0.25  | 4.2                               |  |  |
| Ho       | 1.20      | 0.06            | 5.2                  | 1.16                                  | 0.97     | 1.24     | 0.02 | 2.0                               | 1.18   | 0.06  | 5.0                               |  |  |
| Er       | 3.40      | 0.14            | 4.2                  | 3.30                                  | 1.04     | 3.46     | 0.04 | 1.1                               | 3.40   | 0.19  | 5.7                               |  |  |
| Tm       | 0.47      | 0.03            | 6.5                  | 0.47                                  | 1.70     | 0.48     | 0.01 | 1.7                               | 0.46   | 0.03  | 5.8                               |  |  |
| Yb       | 3.25      | 0.20            | 6.2                  | 3.14                                  | 1.27     | 3.42     | 0.08 | 2.4                               | 3.11   | 0.10  | 3.2                               |  |  |
| Lu       | 0.48      | 0.03            | 6.8                  | 0.45                                  | 1.54     | 0.49     | 0.02 | 3.4                               | 0.46   | 0.03  | 5.4                               |  |  |
| Hf       | 4.38      | 0.25            | 5.8                  | 4.21                                  | 1.06     | 4.76     | 0.20 | 4.3                               | 4.57   | 0.12  | 2.6                               |  |  |
| Ta       | 0.76      | 0.05            | 6.1                  | 0.74                                  | 1.36     | 0.73     | 0.01 | 1.4                               | 0.70   | 0.03  | 4.3                               |  |  |
| Pb       | 10.94     | 0.25            | 2.3                  | 10.94                                 | 1.24     | 10.90    | 0.20 | 1.4                               | 10.63  | 0.83  | 7.8                               |  |  |
| Th       | 5.65      | 0.19            | 3.4                  | 5.45                                  | 0.84     | 5.82     | 0.27 | 4.6                               | 5.62   | 0.23  | 4.1                               |  |  |
| U        | 1.73      | 0.07            | 3.9                  | 1.73                                  | 1.30     | 1.66     | 0.03 | 1.7                               | 1.65   | 0.12  | 7.3                               |  |  |

<sup>1</sup> n: number of averaged values

<sup>2</sup> SD is the standard deviation of the mean ( $1\sigma$ )

<sup>3</sup> RSD is the relative standard deviation ( $100 \cdot s/\text{mean}$ )

\* Data from Jochum et al. (2008)<sup>10</sup>

**Table 8.** Sulphur and halogen composition of standards SY-2 (syenite), BHVO-1 (basalt), BE-N (basalt), AGV-1 (andesite) and JR-1 (rhyolite) extracted by pyrohydrolysis

|                              | This work | RSD (%) <sup>2</sup> | G.1994 & I. 1995 <sup>3</sup> | GeoReM >2000 <sup>4</sup> | M & V 2003 <sup>5</sup> |
|------------------------------|-----------|----------------------|-------------------------------|---------------------------|-------------------------|
| Sulphide bearing syenite SY2 |           |                      |                               |                           |                         |
| <i>n</i> <sup>1</sup>        | 4         |                      |                               |                           |                         |
| S ( <i>ppm</i> )             | 116       | 11                   | 160                           | 121.5±5.6                 | 115± 25                 |
| Basalt BHVO-1                |           |                      |                               |                           |                         |
| <i>n</i>                     | 8         |                      |                               |                           |                         |
| F ( <i>ppm</i> )             | 394       | 12.8                 | 385± 31 R                     | 413± 4                    |                         |
| Cl ( <i>ppm</i> )            | 79        | 6.8                  | 92 R                          | 90±7                      |                         |
| Br ( <i>ppm</i> )            | 0.25      | 15.6                 | n.a.                          | 0.22±0.07*                |                         |
| S ( <i>ppm</i> )             | 90        | 17.3                 | 102 R                         | 93± 6; 54±5               |                         |
| Anorthosite AGV-1            |           |                      |                               |                           |                         |
| <i>n</i>                     | 5         |                      |                               |                           |                         |
| F ( <i>ppm</i> )             | 450       | 5.9                  | 425± 50                       | 402± 12                   |                         |
| Cl ( <i>ppm</i> )            | 102       | 4.0                  | 119±26                        | 170±3; 107±10             |                         |
| Br ( <i>ppm</i> )            | 0.29      | 10.8                 | 0.32                          | 0.34±0.01*                |                         |
| Basalt BE-N                  |           |                      |                               |                           |                         |
| <i>n</i>                     | 4         |                      |                               |                           |                         |
| F ( <i>ppm</i> )             | 1077      | 0.7                  | 1000±152 <sup>R</sup>         |                           | 1080±7                  |
| Cl ( <i>ppm</i> )            | 170       | 10                   | 200±88                        |                           | 179±8                   |
| Br ( <i>ppm</i> )            | 0.34      | 6.0                  |                               | 0.32±0.05*                | 0.6±0.1*                |
| S ( <i>ppm</i> )             | 298       | 2.3                  | 300±150                       | 312±14*                   | 308±31                  |
| Rhyolite JR-1                |           |                      |                               |                           |                         |
| <i>n</i>                     | 3         |                      |                               |                           |                         |
| F ( <i>ppm</i> )             | 1011      | 2.7                  | 991 <sup>R</sup>              | 1034±40; 1011±28          |                         |
| Cl ( <i>ppm</i> )            | 913       | 1.0                  | 920 <sup>R</sup>              | 951±67                    |                         |
| Br ( <i>ppm</i> )            | 0.30      | 11.5                 |                               | 2.1±0.2*                  |                         |

<sup>1</sup> *n*: number of average values

<sup>2</sup> RSD is the relative standard deviation (100' s/mean)

<sup>3</sup> SY2, BHVO-1, AGV-1, BE-N: Govindaraju (1994)<sup>11</sup>; JR-1: Imai et al. (1995)<sup>12</sup>

<sup>4</sup> Average values from GeoREM database of the last 15 years with associated RSD. GeoREM: <http://georem.mpch-mainz.gwdg.de/>

<sup>5</sup> Michel and Villemant (2003)<sup>13</sup>

<sup>R</sup> Reference value

\* One measurement



## References

1. Vidal, C. M. *et al.* Dynamics of the major plinian eruption of Samalas in 1257 A.D. (Lombok, Indonesia). *Bull. Volcanol.* **77**, 73 (2015).
2. Foden, J. D. & Green, D. H. Possible role of amphibole in the origin of andesite: some experimental and natural evidence. *Contrib. to Mineral. Petrol.* **109**, 479–493 (1992).
3. Danyushevsky, L. V., Della, F. N. & Sokolov, S. Re-equilibration of melt inclusions trapped by magnesian olivine phenocrysts from subduction-related magmas : petrological implications. *Contrib. to Mineral. Petrol.* **138**, 68–83 (2000).
4. Nasution, A., Takada, A. & Mulyana, R. The volcanic activity of Rinjani, Lombok island, Indonesia, during the last 10000 years, viewed from <sup>14</sup>C ages (Indonesian Association of Geologist, Convention Bandung 2004, 2004).
5. Lange, R. a., Frey, H. M. & Hector, J. A thermodynamic model for the plagioclase-liquid hygrometer/thermometer. *Am. Mineral.* **94**, 494–506 (2009).
6. Gaetani, G. A., O’Leary, J. A., Shimizu, N., Bucholz, C. E. & Newville, M. Rapid reequilibration of H<sub>2</sub>O and oxygen fugacity in olivine-hosted melt inclusions. *Geology* **40**, 915–918 (2012).
7. Sigmarsson, O. *et al.* Formation of U-depleted rhyolite from a basanite at El Hierro, Canary Islands. *Contrib. to Mineral. Petrol.* **165**, 601–622 (2013).
8. Jenner, F. E. & O’Neill, H. S. C. Major and trace analysis of basaltic glasses by laser-ablation ICP-MS. *Geochemistry, Geophys. Geosystems* **13**, 1–17 (2012).
9. Jochum, K. P. *et al.* Non-Matrix-Matched Calibration for the Multi-Element Analysis of Geological and Environmental Samples Using 200 nm Femtosecond LA-ICP-MS: A Comparison with Nanosecond Lasers. *Geostand. Geoanalytical Res.* **38**, 265–292 (2014).
10. Jochum, K. P. & Nohl, U. Reference materials in geochemistry and environmental research and the GeoReM database. *Chem. Geol.* **253**, 50–53 (2008).
11. Govindaraju, K. Compilation of working values and sample descriptions for 383 geostandards. *Geostand. Newsletter* **18** (1994).
12. Imai, N. & TERASHIMA, S. 1994 compilation of analytical data for minor and trace elements in seventeen GSJ geochemical reference samples, “igneous rock series”. *Geostand. . .* (1995).
13. Michel, A. & Villemant, B. Determination of halogens (F, Cl, Br, I), sulfur and water in seventeen geological reference materials. *Geostand. Geoanalytical Res.* **27**, 163–171 (2003).
